# Supplementary material
Source: publisher figshare collection journal article supplement (https://frontiersin.figshare.com/ndownloader/files/29063517)
Supplement: Supplementary file 1 [file 29063517]

## Supplementary Material

### 1 Supplementary Figures

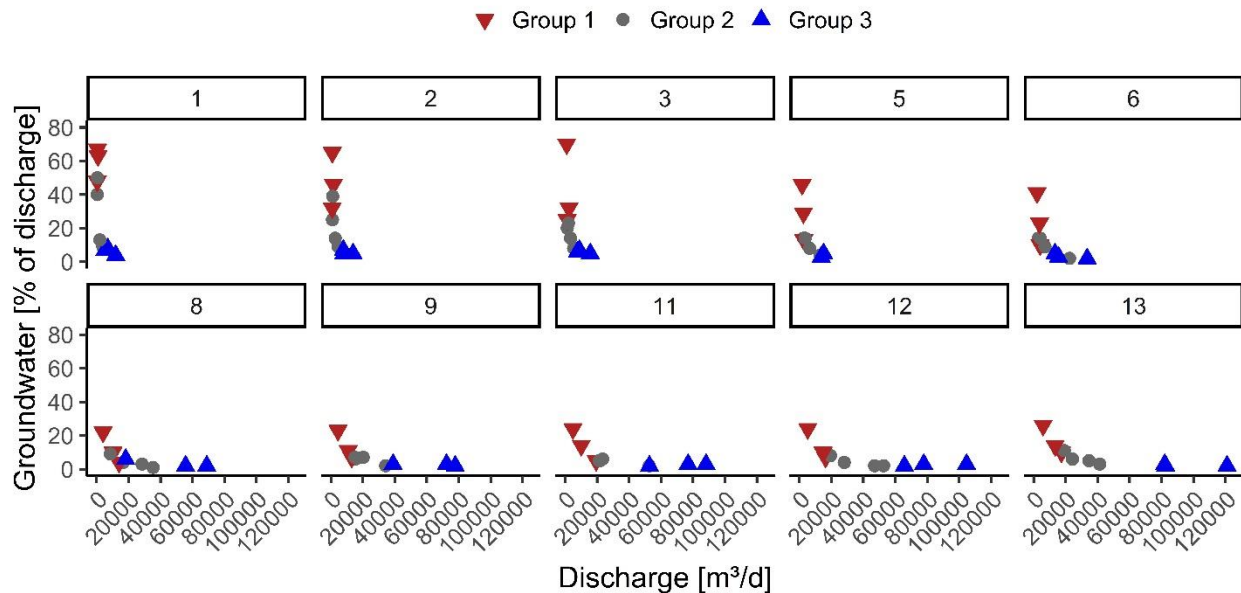

**Supplementary Figure 1.** Groundwater Flux as % of the total discharge for each reach. This figure shows the same data as figure 6 (B) in the main text but is divided into the reaches. In this way, it can be shown that the effect of rising groundwater proportion with declining discharge is no artifact of the discharge increasing over the stream length.
